# Supplementary material
Source: HighWire-hosted journal article supplement (https://bmjopen.bmj.com/content/12/8/e062392)
Supplement: inline-supplementary-material-1 [file inline-supplementary-material-1.pdf]

## Supplemental file 1.

**Search strategy:**

The following search strategy was used and adapted where appropriate for each database:

Free text searches:

1. ("pregnancy") and (renal\* or kidney\*) and (decision\*)  
("pregnancy") and (kidney\*) and (decision\*) and (women\*)  
("pregnancy") and ("chronic kidney disease") and (decision\*) and (women\*)
  
2. "chronic kidney disease" OR "kidney transplant" OR "renal transplant" OR "dialysis patient"  
OR "peritoneal dialysis" OR "endstage kidney disease" OR "end stage renal disease" OR "end  
stage renal failure" OR "pre-emptive kidney transplant"  
pregnant\*  
perspective OR "decision making" OR "decision-making" OR choice  
qualitative or "mixed method"
  
3. experience OR "decision making" OR "decision-making" OR choice  
"chronic kidney disease" OR "kidney transplant" OR "renal transplant" OR "dialysis patient" OR  
"peritoneal dialysis" OR "endstage kidney disease" OR "end stage renal disease" OR "end stage  
renal failure" OR "pre-emptive kidney transplant" OR "kidney transplant"  
pregnant\*  
qualitative or mixed method"
