# Supplementary material
Source: HighWire-hosted journal article supplement (https://bmjopen.bmj.com/content/12/8/e062392)
Supplement: inline-supplementary-material-4 [file inline-supplementary-material-4.pdf]

### Supplemental file.4 Enhancing transparency in reporting the synthesis of qualitative research: ENTREQ Checklist

| No | Item                       | Guide and description                                                                                                                                                                                                                                                                                                                                                                                            | Page no and/or source data |
|----|----------------------------|------------------------------------------------------------------------------------------------------------------------------------------------------------------------------------------------------------------------------------------------------------------------------------------------------------------------------------------------------------------------------------------------------------------|----------------------------|
| 1  | Aim                        | State the research question the synthesis addresses.                                                                                                                                                                                                                                                                                                                                                             | 4                          |
| 2  | Synthesis methodology      | Identify the synthesis methodology or theoretical framework which underpins the synthesis, and describe the rationale for choice of methodology (e.g. <i>meta-ethnography, thematic synthesis, critical interpretive synthesis, grounded theory synthesis, realist synthesis, meta-aggregation, meta-study, framework synthesis</i> ).                                                                           | 4-5                        |
| 3  | Approach to searching      | Indicate whether the search was pre-planned ( <i>comprehensive search strategies to seek all available studies</i> ) or iterative ( <i>to seek all available concepts until they theoretical saturation is achieved</i> ).                                                                                                                                                                                       | 4-5                        |
| 4  | Inclusion criteria         | Specify the inclusion/exclusion criteria (e.g. <i>in terms of population, language, year limits, type of publication, study type</i> ).                                                                                                                                                                                                                                                                          | 4-5                        |
| 5  | Data sources               | Describe the information sources used (e.g. <i>electronic databases (MEDLINE, EMBASE, CINAHL, psycINFO, Econlit), grey literature databases (digital thesis, policy reports), relevant organisational websites, experts, information specialists, generic web searches (Google Scholar) hand searching, reference lists</i> ) and when the searches conducted; provide the rationale for using the data sources. | 4-5                        |
| 6  | Electronic Search strategy | Describe the literature search (e.g. <i>provide electronic search strategies with population terms, clinical or health topic terms, experiential or social phenomena related terms, filters for qualitative research, and search limits</i> ).                                                                                                                                                                   | 4-5                        |
| 7  | Study screening methods    | Describe the process of study screening and sifting (e.g. <i>title, abstract and full text review, number of independent reviewers who screened studies</i> ).                                                                                                                                                                                                                                                   | 5 & Supplemental file 1    |
| 8  | Study characteristics      | Present the characteristics of the included studies (e.g. <i>year of publication, country, population, number of participants, data collection, methodology, analysis, research questions</i> ).                                                                                                                                                                                                                 | 6 & 7 and table 1          |
| 9  | Study selection results    | Identify the number of studies screened and provide reasons for study exclusion (e.g. <i>for comprehensive searching, provide numbers of studies screened and reasons for exclusion indicated in a figure/flowchart; for iterative searching describe reasons for study exclusion and inclusion based on modifications to the research question and/or contribution to theory development</i> ).                 | Fig.1                      |
| 10 | Rationale for appraisal    | Describe the rationale and approach used to appraise the included studies or selected findings (e.g. <i>assessment of conduct (validity and robustness), assessment of reporting (transparency), assessment of content and utility of the findings</i> ).                                                                                                                                                        | 6                          |
| 11 | Appraisal items            | State the tools, frameworks and criteria used to appraise the studies or selected findings (e.g. <i>Existing tools: CASP, QARI, COREQ, Mays and Pope [25]; reviewer developed tools; describe the domains assessed: research team, study design, data analysis and interpretations, reporting</i> ).                                                                                                             | 5-6                        |
| 12 | Appraisal process          | Indicate whether the appraisal was conducted independently by more than one reviewer and if consensus was required.                                                                                                                                                                                                                                                                                              | 5                          |
| 13 | Appraisal results          | Present results of the quality assessment and indicate which articles, if any, were weighted/excluded based on the assessment and give the rationale.                                                                                                                                                                                                                                                            | 6-7 Supplemental file 2    |

#### Supplemental file.4 Enhancing transparency in reporting the synthesis of qualitative research: ENTREQ Checklist

|    |                      |                                                                                                                                                                                                                                                               |                          |
|----|----------------------|---------------------------------------------------------------------------------------------------------------------------------------------------------------------------------------------------------------------------------------------------------------|--------------------------|
| 14 | Data extraction      | Indicate which sections of the primary studies were analysed and how were the data extracted from the primary studies? ( <i>e.g. all text under the headings "results /conclusions" were extracted electronically and entered into a computer software</i> ). | 5 & supplemental file 3. |
| 15 | Software             | State the computer software used, if any.                                                                                                                                                                                                                     | 5                        |
| 16 | Number of reviewers  | Identify who was involved in coding and analysis.                                                                                                                                                                                                             | 5                        |
| 17 | Coding               | Describe the process for coding of data ( <i>e.g. line by line coding to search for concepts</i> ).                                                                                                                                                           | 5                        |
| 18 | Study comparison     | Describe how were comparisons made within and across studies ( <i>e.g. subsequent studies were coded into pre-existing concepts, and new concepts were created when deemed necessary</i> ).                                                                   | 5-6                      |
| 19 | Derivation of themes | Explain whether the process of deriving the themes or constructs was inductive or deductive.                                                                                                                                                                  | 6                        |
| 20 | Quotations           | Provide quotations from the primary studies to illustrate themes/constructs, and identify whether the quotations were participant quotations of the author's interpretation.                                                                                  | 10-12                    |
| 21 | Synthesis output     | Present rich, compelling and useful results that go beyond a summary of the primary studies ( <i>e.g. new interpretation, models of evidence, conceptual models, analytical framework, development of a new theory or construct</i> ).                        | 13                       |
